# Supplementary material
Source: PubMed Central journal article supplement (PMC5844833)

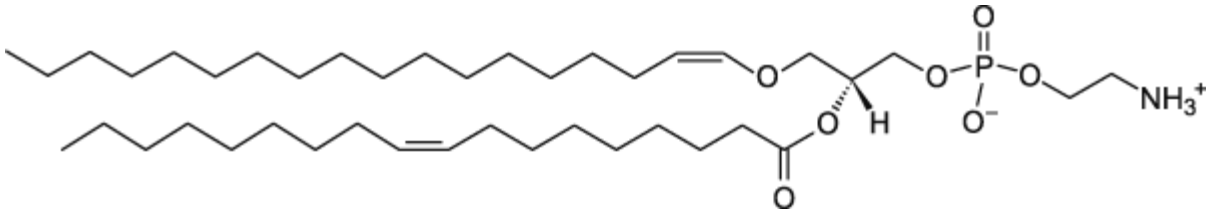

p18:0/18:1-PE

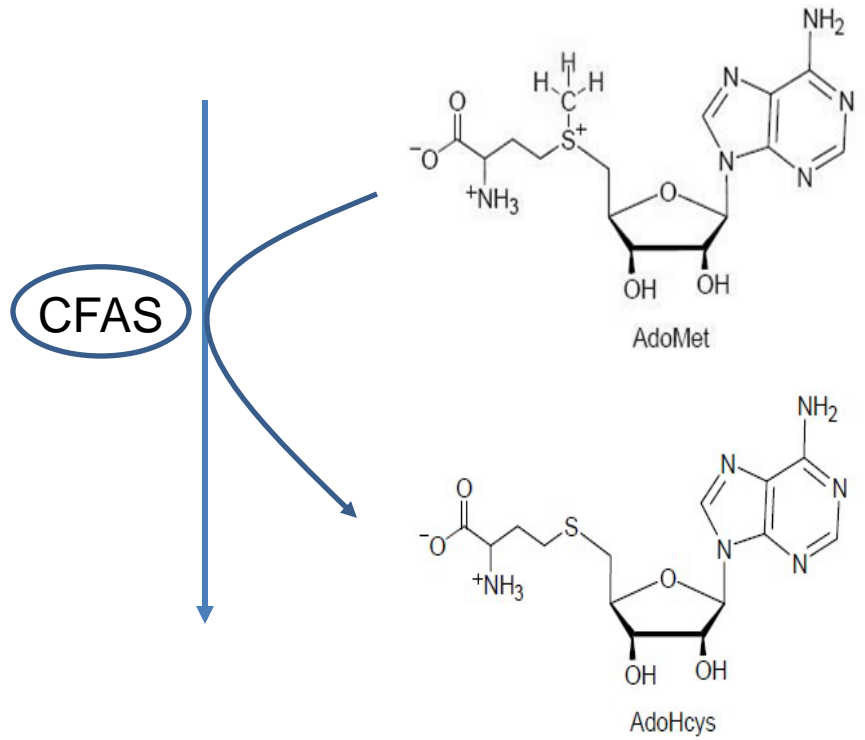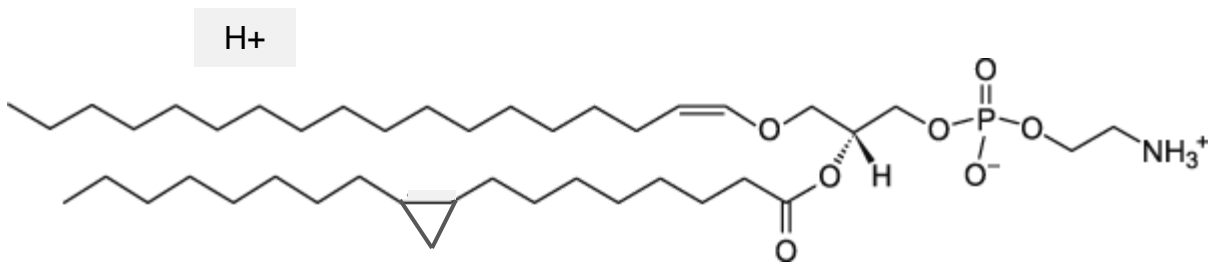

p18:1/C19:0cPro(9)-PE

Supplement: NIHMS925496-supplement-1.pdf [file NIHMS925496-supplement-1.pdf]

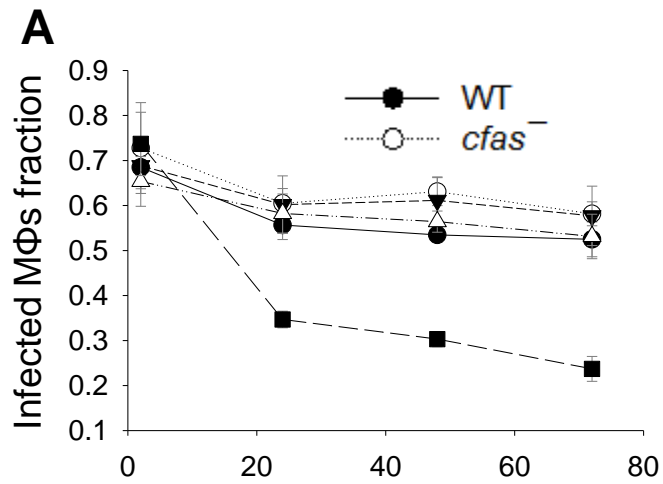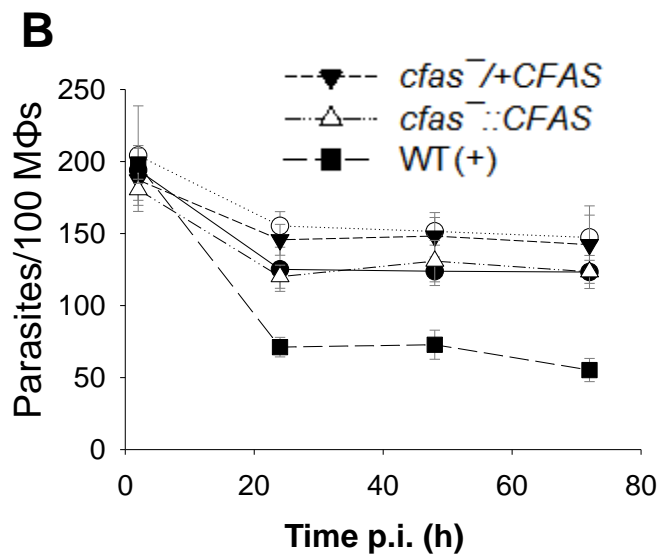

Supplement: NIHMS925496-supplement-10.pdf [file NIHMS925496-supplement-10.pdf]

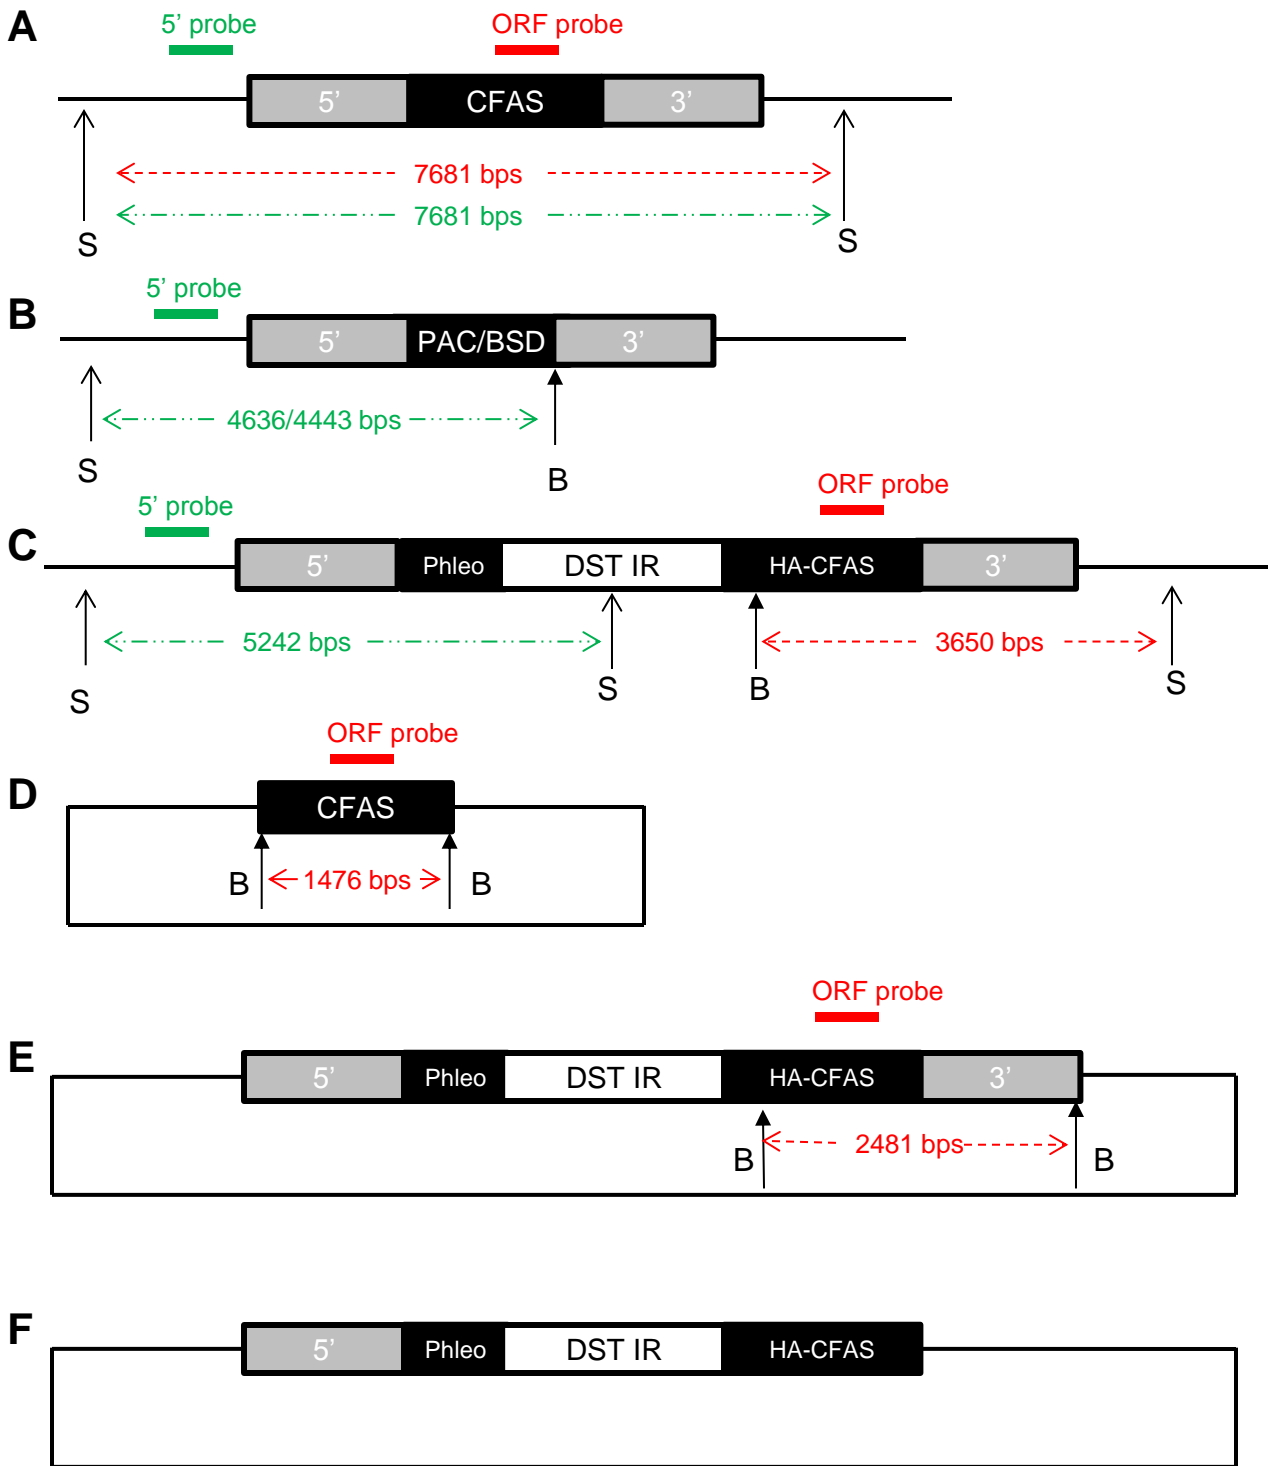

Supplement: NIHMS925496-supplement-2.pdf [file NIHMS925496-supplement-2.pdf]

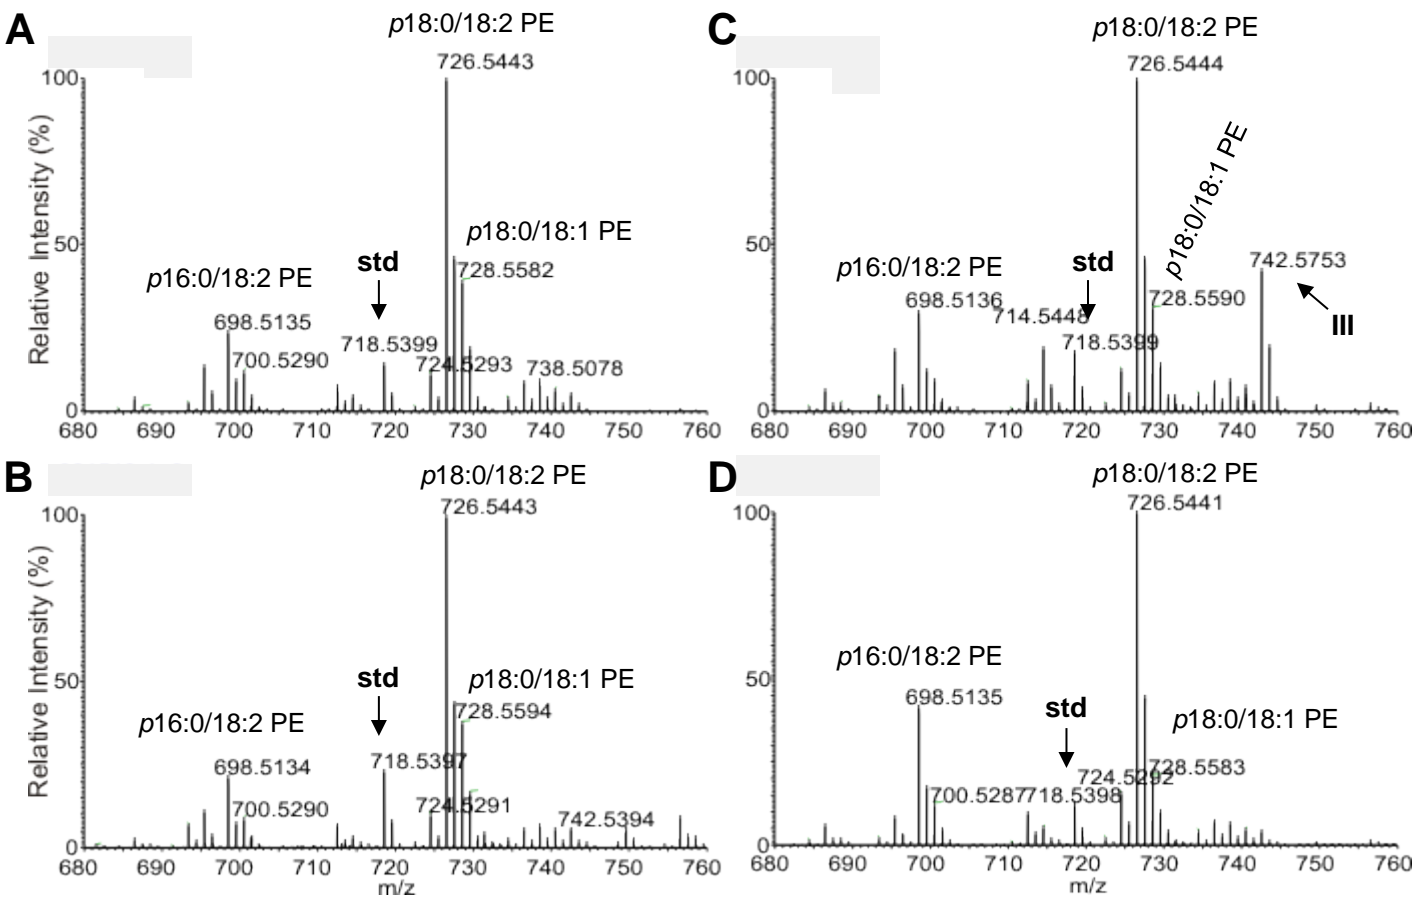

Supplement: NIHMS925496-supplement-3.pdf [file NIHMS925496-supplement-3.pdf]

**A**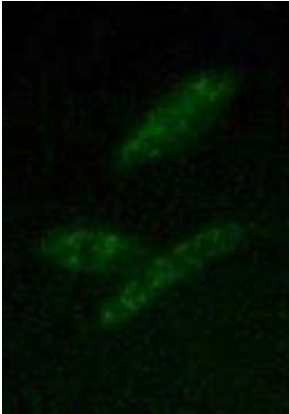**B**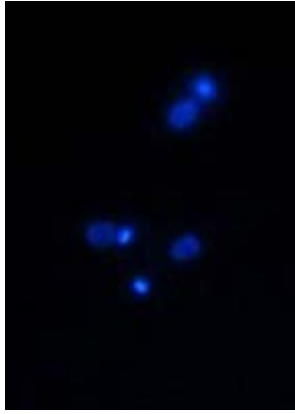**C**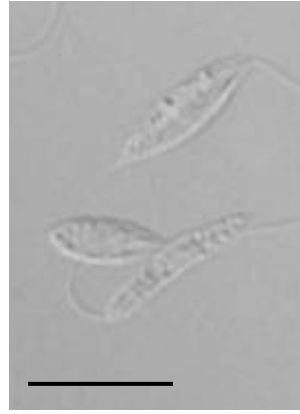**D**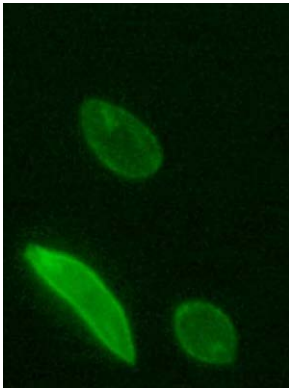**E**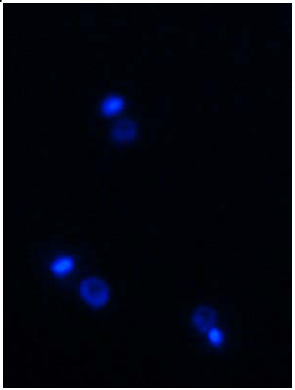**F**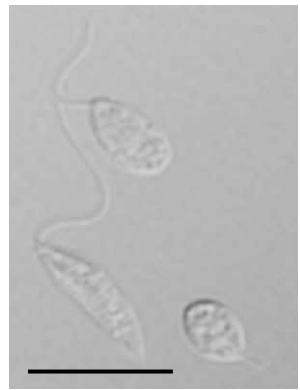

Supplement: NIHMS925496-supplement-4.pdf [file NIHMS925496-supplement-4.pdf]

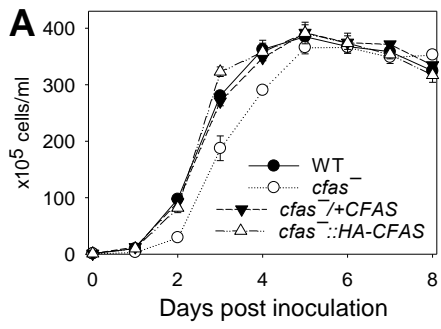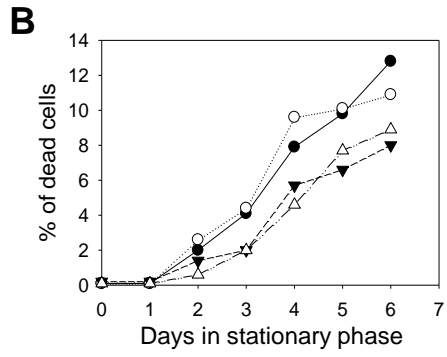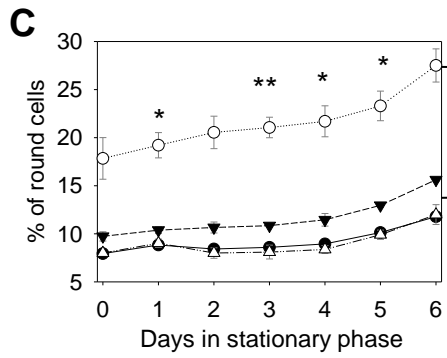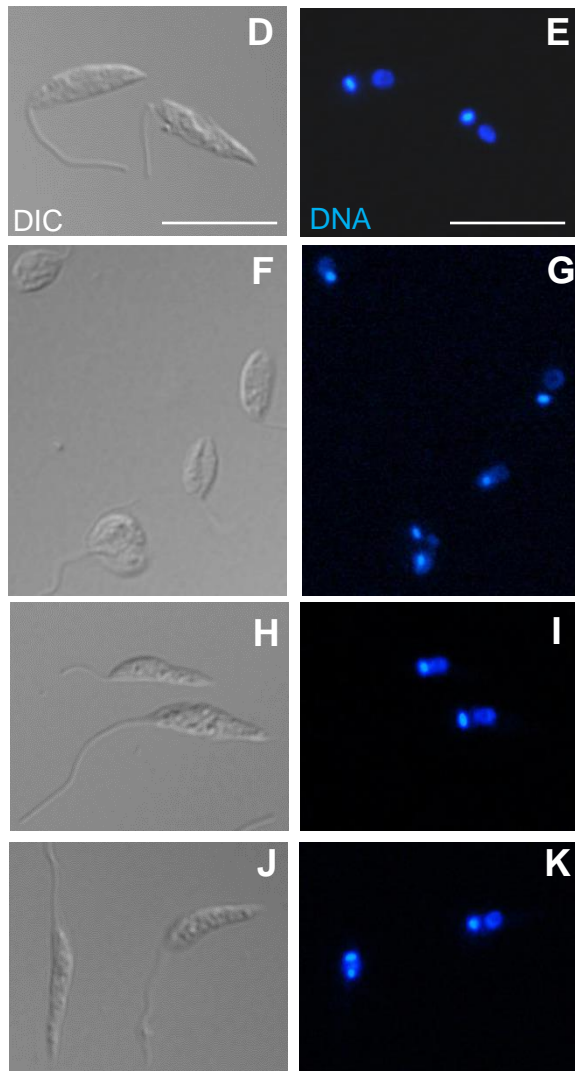

Supplement: NIHMS925496-supplement-5.pdf [file NIHMS925496-supplement-5.pdf]

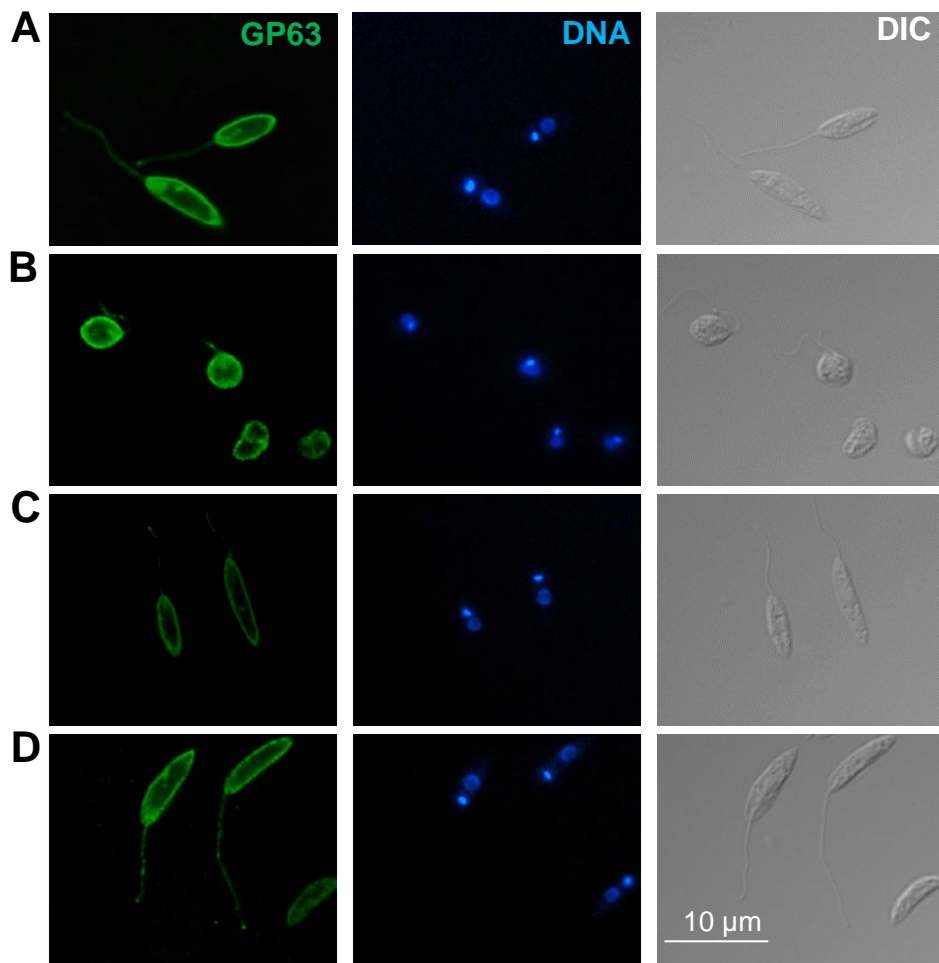

Supplement: NIHMS925496-supplement-6.pdf [file NIHMS925496-supplement-6.pdf]

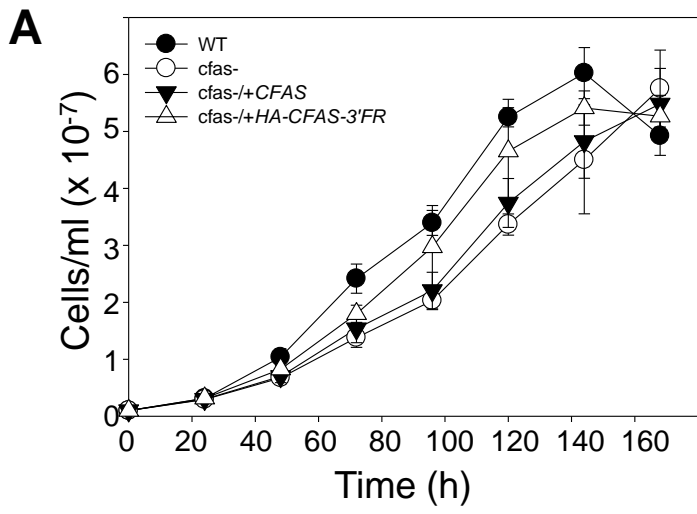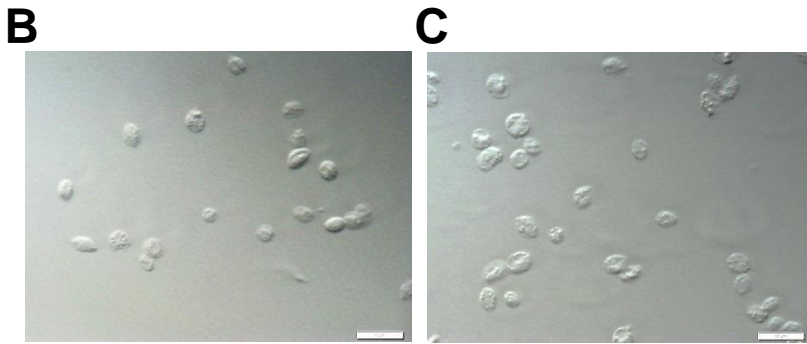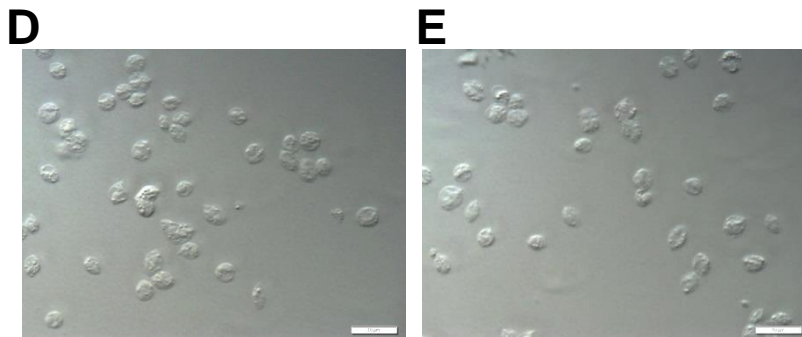

Supplement: NIHMS925496-supplement-7.pdf [file NIHMS925496-supplement-7.pdf]

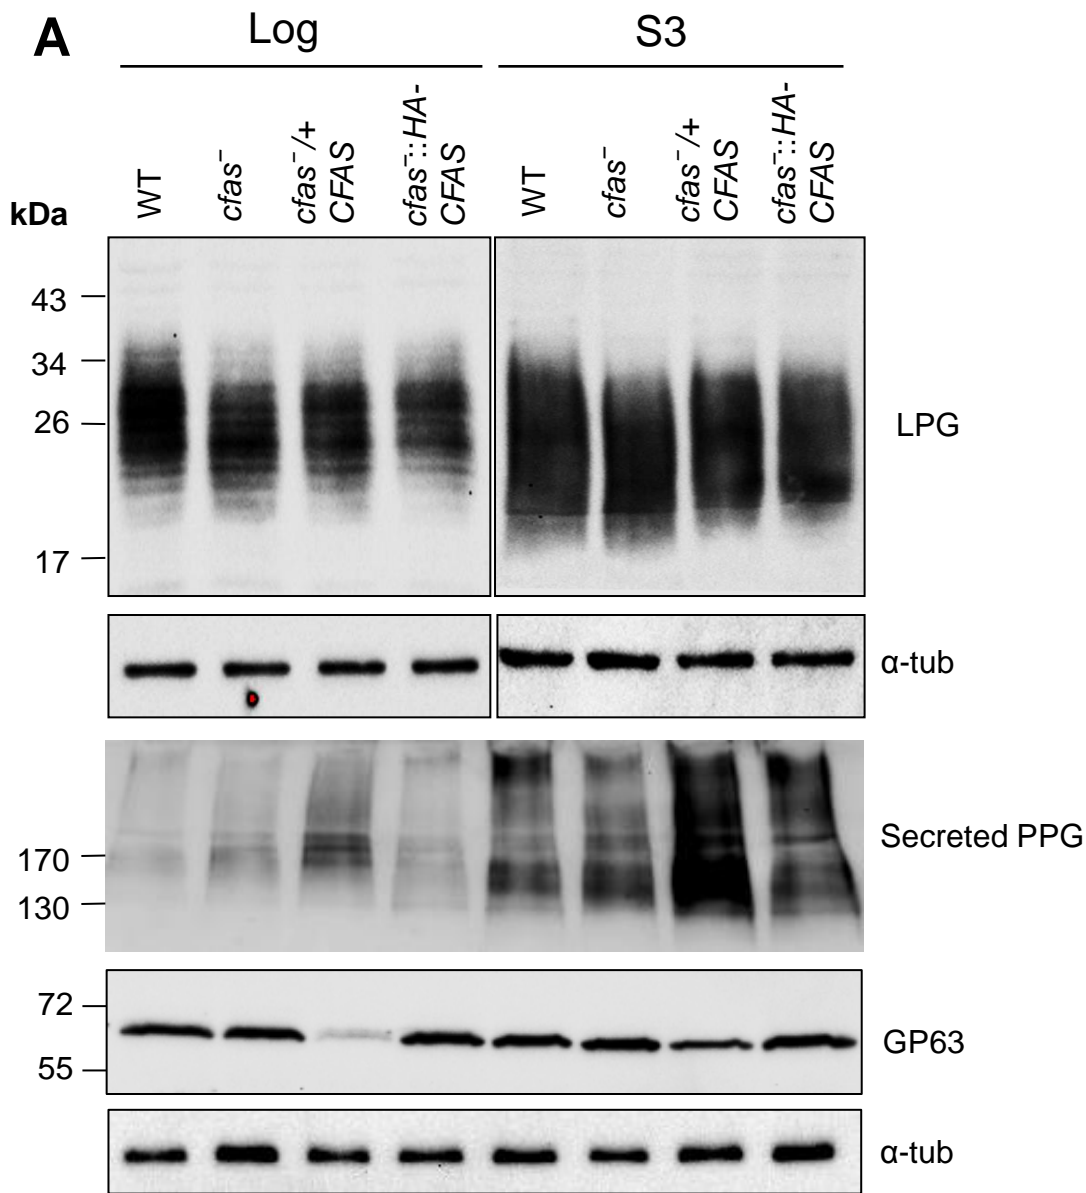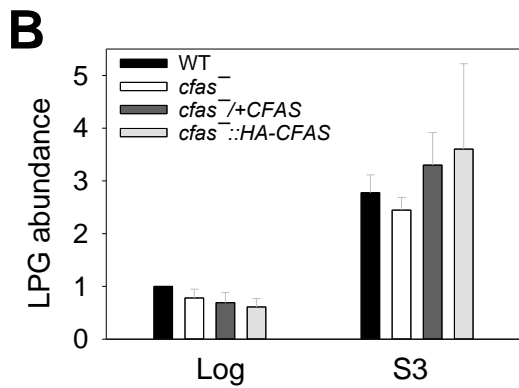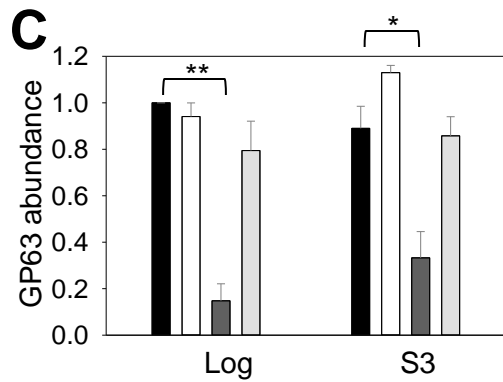

Supplement: NIHMS925496-supplement-8.pdf [file NIHMS925496-supplement-8.pdf]

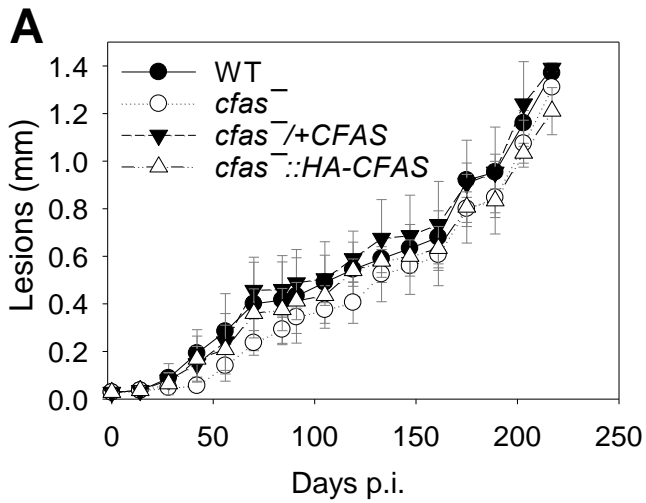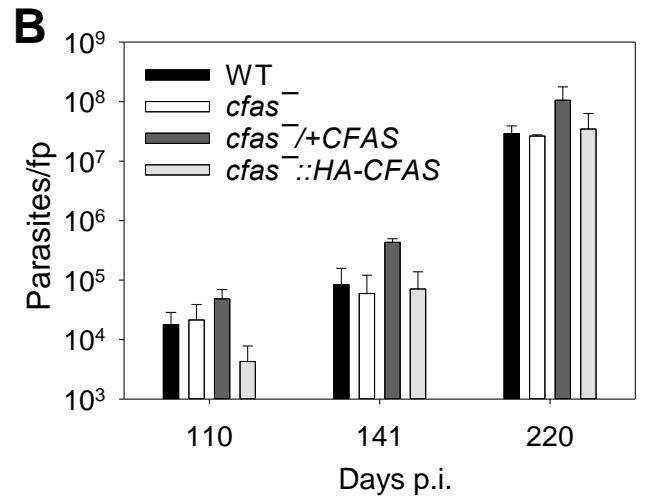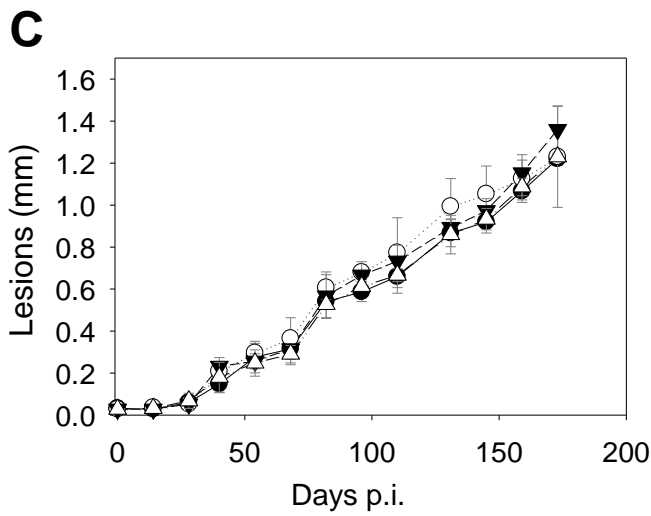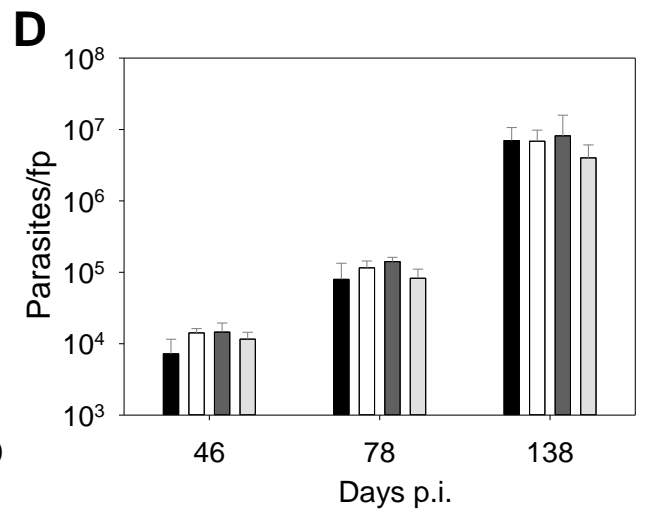

Supplement: NIHMS925496-supplement-9.pdf [file NIHMS925496-supplement-9.pdf]
